# Supplementary material for: Diversity of Cardiologic Issues in a Contemporary Cohort of Women With Breast Cancer
Source: PubMed Central journal article supplement (PMC8517118; doi:10.3389/fcvm.2021.654728), 2021-10-01
Supplement: Data_Sheet_1.pdf [file Data_Sheet_1.pdf]

## **Supplemental Material**

Tini et al., *Diversity of Cardiologic Issues in a Contemporary Cohort of Women with Breast Cancer*

**Supplementary Table 1s. Details of anticancer treatments**

|                                       | n = 508 (%) |
|---------------------------------------|-------------|
| <i>Anthracyclines</i>                 | 287 (57)    |
| In combination with anti-HER2         | 91 (18)     |
| In combination with taxanes           | 257 (51)    |
| In combination with pyrimidines       | 29 (6)      |
| In combination with ciclophosphamide  | 275 (54)    |
| <i>Anti-HER2</i>                      | 165 (33)    |
| Only trastuzumab                      | 129 (25)    |
| Trastuzumab and pertuzumab            | 36 (7)      |
| In combination with taxanes           | 148 (29)    |
| <i>Taxanes &amp; Ciclophosphamide</i> |             |
| In combination with other therapies   | 291 (57)    |
| Alone                                 | 32 (6)      |
| <i>Pyrimidines</i>                    | 79 (16)     |
| <i>Cycline-inhibitors</i>             | 46 (9)      |
| <i>Anti-VEGF</i>                      | 16 (3)      |

VEGF: vascular endothelial growth factor; HER2: human epidermal growth factor receptor 2

**Supplementary Table 2s. Details of CV events other than LVD-CTX**

| Event                                     | n (10) | Anticancer treatment                                                                       |
|-------------------------------------------|--------|--------------------------------------------------------------------------------------------|
| <i>Pulmonary Embolism</i>                 | 3      | Epirubicin (1)<br>Epirubicin, cyclophosphamide and 5-fluoro-uracil (1)<br>Capecitabine (1) |
| <i>Uncontrolled arterial hypertension</i> | 2      | Anti-VEGF                                                                                  |
| <i>Atrial fibrillation</i>                | 2      | Cyclin-inhibitors (1)<br>Taxanes (1)                                                       |
| <i>Cardiac tamponade</i>                  | 1      | Anti-HER2 (trastuzumab and pertuzumab)                                                     |
| <i>Takotsubo syndrome</i>                 | 1      | Cyclin-inhibitors                                                                          |
| <i>Ischaemic stroke</i>                   | 1      | Epirubicin, cyclophosphamide, taxanes and trastuzumab<br>(1 year after completion)         |

CV: cardiovascular; LVD-CTX: left ventricular dysfunction cardiotoxicity; VEGF: vascular endothelial growth factor; HER2: human epidermal growth factor receptor 2

**Supplementary Table 3s. Predictors of all-cause mortality**

| <i>Variable</i>                       | <b>Univariate</b>        |                  | <b>Multivariate*</b>     |                  |
|---------------------------------------|--------------------------|------------------|--------------------------|------------------|
|                                       | <i>HR (95%CI)</i>        | <i>p</i>         | <i>HR (95%CI)</i>        | <i>p</i>         |
| Age                                   | 1.04 (1.01-1.06)         | 0.004            | -                        | -                |
| <b>Advanced setting</b>               | <b>7.76 (4.48-13.45)</b> | <b>&lt;0.001</b> | <b>7.80 (4.47-13.62)</b> | <b>&lt;0.001</b> |
| Previous exposition to anthracyclines | 4.12 (2.20-7.70)         | <0.001           | -                        | -                |
| Anthracycline chemotherapy            | 0.28 (0.16-0.50)         | <0.001           | -                        | -                |
| Trastuzumab therapy                   | 0.21 (0.08-0.59)         | 0.003            | -                        | -                |
| Arterial hypertension                 | 1.75 (1.03-3.01)         | 0.04             | -                        | -                |
| Diabetes mellitus                     | 2.12 (1.04-4.34)         | 0.04             | -                        | -                |
| <b>AF</b>                             | <b>3.42 (1.55-7.56)</b>  | <b>0.002</b>     | <b>4.12 (1.85-9.20)</b>  | <b>0.001</b>     |
| <b>Other CV events</b>                | <b>3.84 (1.39-10.63)</b> | <b>0.01</b>      | 1.77 (0.63-4.95)         | 0.28             |

\*variable selection method: backward stepwise elimination

AF: atrial fibrillation; CV: cardiovascular
